# Supplementary material
Source: PubMed Central journal article supplement (PMC9645433)
Supplement: ehp11015.s001.acco.pdf [file ehp11015.s001.acco.pdf]

**Note to readers with disabilities:** *EHP* strives to ensure that all journal content is accessible to all readers. However, some figures and Supplemental Material published in *EHP* articles may not conform to [508 standards](#) due to the complexity of the information being presented. If you need assistance accessing journal content, please contact [ehp508@niehs.nih.gov](mailto:ehp508@niehs.nih.gov). Our staff will work with you to assess and meet your accessibility needs within 3 working days.

### **Supplemental Material**

#### **Assessing How Social Exposures Are Integrated in Exposome Research: A Scoping Review**

Lola Neufcourt, Raphaële Castagné, Laurence Mabile, Saman Khalatbari-Soltani, Cyrille Delpierre, and Michelle Kelly-Irving

#### **Table of Contents**

**Figure S1.** Selection flowchart.

**Table S1.** Characteristics of the 73 selected studies.

**Table S2.** Use of social variables.

**Table S3.** Nature, frequency and use of the social variables.

**Table S4.** Social hypotheses and mechanisms.

**References**

**Figure S1: Selection flowchart**

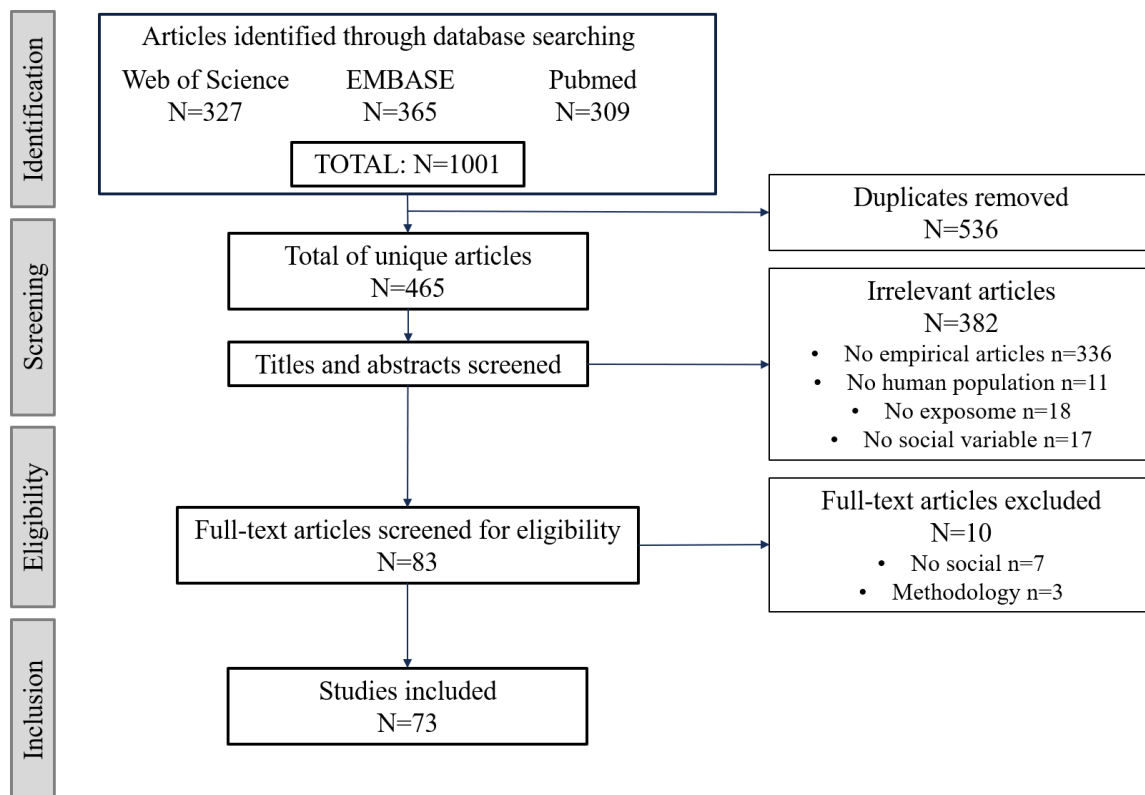

**Table S1: Characteristics of the 73 selected studies**

| Authors                      | Publication year | Journal                                                           | Title                                                                                                                                         | Country of origin                                             | Study population                                                                      | Inclusion period                                      | Sample size | Age range/mean                          |
|------------------------------|------------------|-------------------------------------------------------------------|-----------------------------------------------------------------------------------------------------------------------------------------------|---------------------------------------------------------------|---------------------------------------------------------------------------------------|-------------------------------------------------------|-------------|-----------------------------------------|
| Agier et al <sup>1</sup>     | 2019             | Lancet Planetary Health                                           | Early-life exposome and lung function in children in Europe: an analysis of data from the longitudinal, population-based HELIX cohort         | United Kingdom / France / Spain / Lithuania / Norway / Greece | Mother-child pairs from the HELIX cohort                                              | Depends on the country sub-cohort (from 1999 to 2010) | n=1033      | 6-12 years old<br>Median age: 8.1 years |
| Andrianou et al <sup>2</sup> | 2019             | PeerJ                                                             | Application of the urban exposome framework using drinking water and quality of life indicators: a proof-of concept study in Limassol, Cyprus | Cyprus                                                        | Residents of the Limassol municipality                                                | 2017                                                  | n=132       | Mean age: 45.6±13.2 years               |
| Barzilay et al <sup>3</sup>  | 2021             | Neurobiology of Stress                                            | Deconstructing the role of the exposome in youth suicidal ideation: Trauma, neighborhood environment, developmental and gender effects        | United States                                                 | Participants from the Philadelphia Neurodevelopmental Cohort                          | 2009-2011                                             | n=7054      | 11-21 years old                         |
| Bennett et al <sup>4</sup>   | 2020             | International Journal of Environmental Research and Public Health | Characterizing the neurodevelopmental pesticide exposome in a Children's Agricultural Cohort                                                  | United States                                                 | Households from the agricultural children's cohort located in the Lower Yakima Valley | 2005 and 2011                                         | n=200       | NA                                      |
| Bergmann et al <sup>5</sup>  | 2017             | Journal of Exposure Science and Environmental Epidemiology        | Multi-class chemical exposure in rural Peru using silicone wristbands                                                                         | Peru                                                          | Participants from 4 communities of the Alto Mayo                                      | 2014                                                  | n=68        | 6-73 years old<br>Median age: 39 years  |

|                                |      |                                                                   |                                                                                                                                           |                             |                                                                                                                                                                                                     |                                                |                           |                                                      |
|--------------------------------|------|-------------------------------------------------------------------|-------------------------------------------------------------------------------------------------------------------------------------------|-----------------------------|-----------------------------------------------------------------------------------------------------------------------------------------------------------------------------------------------------|------------------------------------------------|---------------------------|------------------------------------------------------|
| Buekers et al <sup>6</sup>     | 2018 | International Journal of Environmental Research and Public Health | Socio-economic status and health: Evaluation of human biomonitored chemical exposure to per- and polyfluorinated substances across status | Meta-analysis               | Published peer-reviewed studies                                                                                                                                                                     | Up to January 2018                             | n=5                       | NA                                                   |
| Calamandrei et al <sup>7</sup> | 2020 | Environmental Research                                            | Pregnancy exposome and child psychomotor development in three European birth cohorts                                                      | Croatia / Slovenia / Poland | Children from the Public Health Impact of long-term, low-level, Mixed element Exposure in susceptible population strata (PHIME) and Polish mother and child cohort study (REPRO_PL) – HEALS project | Pregnant women recruited between 2006-2011     | n=984                     | 0-2 years old                                        |
| Choi et al <sup>8</sup>        | 2020 | American Journal of Psychiatry                                    | An exposure-wide and mendelian randomization approach to identifying modifiable factors for the prevention of depression                  | United Kingdom              | Adults of white British ancestry enrolled in the UK Biobank                                                                                                                                         | follow-up 6 to 8 years after initial enrolment | n=115,000                 | Mean age: 56±7.7 years old                           |
| Chung et al <sup>9</sup>       | 2018 | Environmental Science and Technology                              | Toward capturing the exposome: exposure biomarker variability and coexposure patterns in the shared environment                           | United States               | Couples from Longitudinal Investigation of Fertility and the Environment (LIFE) Study                                                                                                               | 2005–2009                                      | n=501 (1002 individuals)  | Females: 30±4 years old<br>Males: 31.8±4.9 years old |
| Cifuentes et al <sup>10</sup>  | 2019 | Journal of Urban Health                                           | Application of the public health exposome framework to estimate phenotypes of resilience in a model Ohio African-American women’s cohort  | United States               | [area-level] Counties in Ohio                                                                                                                                                                       | Depends on the source database                 | n=88 (9232 census-blocks) | NA                                                   |

|                                   |      |                                                                |                                                                                                                                                                 |                                                               |                                                                                                                |                                                       |          |                                                             |
|-----------------------------------|------|----------------------------------------------------------------|-----------------------------------------------------------------------------------------------------------------------------------------------------------------|---------------------------------------------------------------|----------------------------------------------------------------------------------------------------------------|-------------------------------------------------------|----------|-------------------------------------------------------------|
| Colicino et al <sup>11</sup>      | 2021 | Environment International                                      | Non-linear and non-additive associations between the pregnancy metabolome and birthweight                                                                       | United States                                                 | Mother-child dyads enrolled in the Programming of Intergenerational Stress Mechanisms (PRISM) cohort           | Pregnant mothers recruited from 2011                  | n=410    | New-borns                                                   |
| Colicino et al <sup>12</sup>      | 2020 | Environmental Research                                         | Association between prenatal immune phenotyping and cord blood leukocyte telomere length in the PRISM pregnancy cohort                                          | United States                                                 | Mother-child dyads enrolled in the PRogramming of Intergenerational Stress Mechanisms (PRISM) pregnancy cohort | Pregnant women included in 2011                       | n=129    | New-borns                                                   |
| de Prado-Bert et al <sup>13</sup> | 2021 | Environment International                                      | The early-life exposome and epigenetic age acceleration in children                                                                                             | United Kingdom / France / Spain / Lithuania / Norway / Greece | Children from the HELIX study                                                                                  | Depends on the country sub-cohort (from 1999 to 2010) | n=1173   | 6-11 years old<br>Mean age (at blood collection) 7± 2 years |
| Doherty et al <sup>14</sup>       | 2020 | Frontiers in Public Health                                     | Assessment of multipollutant exposures during pregnancy using silicone wristbands                                                                               | Unites States                                                 | Women from the New Hampshire Birth Cohort Study                                                                | between March 2017 and December 2018                  | n=255    | 18-45 years old<br>Median age: 31 years                     |
| Dreno et al <sup>15</sup>         | 2019 | Journal of the European Academy of Dermatology and Venereology | The role of exposome in acne: results from an international patient survey                                                                                      | France / Germany / Italy / Brazil / Canada / Russia           | Young adults surveyed via Internet                                                                             | 2018-2019                                             | n=6,679  | 15-39 years old                                             |
| Erzin et al <sup>16</sup>         | 2021 | Psychological Medicine                                         | Association between exposome score for schizophrenia and functioning in first-episode psychosis: results from the Athens first-episode psychosis research study | Greece                                                        | Individuals with first-episode psychosis from the Athens FEP Research Study                                    | Between March 2015 - March 2020                       | n=225    | 16-45 years                                                 |
| Eyles et al <sup>17</sup>         | 2019 | Social Science & Medicine                                      | Occupied with classification: Which occupational classification scheme better predicts health outcomes?                                                         | All EU countries and European Economic Area (EEA) countries   | Participants to the European Working Conditions Survey (EWCS)                                                  | Years 2010 and 2015                                   | n=81,115 |                                                             |
| Ferreira et al <sup>18</sup>      | 2019 | Chemosphere                                                    | Home-based and informal work exposes the families to high levels of potentially toxic elements                                                                  | Brazil                                                        | Participants with at least one outsourced worker who produced jewellery inside of the house                    | 2017                                                  | n=165    | All age groups                                              |

|                                  |      |                                               |                                                                                                                                              |                                                               |                                                                                                        |                                                                 |                     |                                                                                             |
|----------------------------------|------|-----------------------------------------------|----------------------------------------------------------------------------------------------------------------------------------------------|---------------------------------------------------------------|--------------------------------------------------------------------------------------------------------|-----------------------------------------------------------------|---------------------|---------------------------------------------------------------------------------------------|
| Fishe et al <sup>19</sup>        | 2022 | Science of the Total Environment              | Environmental effects on acute exacerbations of respiratory diseases: A real-world big data study                                            | United States                                                 | Patients from the OneFlorida database                                                                  | 2012-2017                                                       | n=533,446           | All age groups (<18 to >80 years)                                                           |
| Gagliardi et al <sup>20</sup>    | 2020 | Cancer Epidemiology Biomarkers and Prevention | Stochastic epigenetic mutations are associated with risk of breast cancer, lung cancer, and mature b-cell neoplasms                          | Italy / Australia / Norway                                    | Case-control pairs nested in three prospective cohorts (EPIC Italy / MCCS Melbourne / Norwegian NOWAC) | EPIC 1992-99<br>MCCS 1990-94<br>NOWAC 2003-06                   | n=4497              | Mean age:<br>EPIC 54±7 years<br>MCCS 59±8 years<br>NOWAC 56±4 years                         |
| Georgopoulos et al <sup>21</sup> | 2014 | Risk Analysis                                 | A tiered framework for risk-relevant characterization and ranking of chemical exposures: applications to the National Children's Study (NCS) | United States                                                 | [area-level]<br>Contiguous US counties                                                                 | Various                                                         | Various, up to 3109 | NA                                                                                          |
| Gittner et al <sup>22</sup>      | 2017 | Obesity Research & Clinical Practice          | A multifactorial obesity model developed from nationwide public health exposome data and modern computational analyses                       | United States                                                 | [area-level]<br>Counties of greater than 100,000 persons                                               | 2009                                                            | n=3106              | NA                                                                                          |
| Golding et al <sup>23</sup>      | 2018 | Wellcome Open Research                        | Are the early childhood antecedents of men's external locus of control similar to those of their female partners?                            | United Kingdom                                                | Men from the Avon Longitudinal Study of Parents and Children (ALSPAC)                                  | expecting a child between 1st April 1991 and 31st December 1992 | n=8645              | 15-65 years old<br>Mean age: 30.6±5.7 years                                                 |
| Golding et al <sup>24</sup>      | 2017 | Wellcome Open Research                        | The mid-childhood and adolescent antecedents of women's external locus of control orientation                                                | United Kingdom                                                | Pregnant women from the Avon Longitudinal Study of Parents and Children (ALSPAC)                       | expected date of delivery between April 1991 and December 1992  | n=12,638            | Pregnant women recruited 1999-2010 (depends on the country sub-cohort); follow-up 2013-2016 |
| Granum et al <sup>25</sup>       | 2020 | Environment International                     | Multiple environmental exposures in early-life and allergy-related outcomes in childhood                                                     | United Kingdom / France / Spain / Lithuania / Norway / Greece | Mother-child pairs from the HELIX (Human Early-Life Exposome) study                                    | 2013-2016                                                       | n=1270              | 6-11 years old                                                                              |

|                              |      |                           |                                                                                                                                                       |                                                               |                                                                                                                               |                                                       |           |                                                                                                                                                |
|------------------------------|------|---------------------------|-------------------------------------------------------------------------------------------------------------------------------------------------------|---------------------------------------------------------------|-------------------------------------------------------------------------------------------------------------------------------|-------------------------------------------------------|-----------|------------------------------------------------------------------------------------------------------------------------------------------------|
| Guillien et al <sup>26</sup> | 2020 | Environmental Research    | Profile of exposures and lung function in adults with asthma: An exposome approach in the EGEA study                                                  | France                                                        | Adults of the Epidemiological study on the Genetics and Environment of Asthma, bronchial hyperresponsiveness and atopy (EGEA) | 2003-2007                                             | n=599     | 16-79 years old<br>Mean age: 39±16 years                                                                                                       |
| Guo et al <sup>27</sup>      | 2021 | Environment International | Exploring personal chemical exposures in China with wearable air pollutant monitors: A repeated-measure study in healthy older adults in Jinan, China | China                                                         | Older adults in Jinan, China, as part of the Biomarkers for Air Pollutants Exposure (China BAPE) study                        | From September 2018 to January 2019                   | n=84      | 60-69 years                                                                                                                                    |
| Hu et al <sup>28</sup>       | 2020 | Environment International | An external exposome-wide association study of hypertensive disorders of pregnancy                                                                    | United States                                                 | Women with registered live births in Florida                                                                                  | Conception date during 2010-2013                      | n=819,399 | Median age between 25-29 years old                                                                                                             |
| Huang et al <sup>29</sup>    | 2021 | BMC Medicine              | Investigating causal relationships between exposome and human longevity: a Mendelian randomization analysis                                           | United Kingdom                                                | Individuals from the UK Biobank                                                                                               | Individuals recruited between 2006-2010               | n=361,194 | <u>90+ group</u> : mean age 97 [87-122] years<br><u>99+ group</u> : mean age 101 [90-122] years<br><u>Control group</u> : mean 55 [0-88] years |
| Juarez et al <sup>30</sup>   | 2017 | Environmental Disease     | A novel approach to analyzing lung cancer mortality disparities: Using the exposome and a graph-theoretical toolchain                                 | United States                                                 | [area-level] Counties                                                                                                         | 1999-2013                                             | n=2067    | NA                                                                                                                                             |
| Julvez et al <sup>31</sup>   | 2021 | Environmental Pollution   | Early life multiple exposures and child cognitive function: A multi-centric birth cohort study in six European countries                              | United Kingdom / France / Spain / Lithuania / Norway / Greece | Mother-child pairs from the HELIX study                                                                                       | Depends on the country sub-cohort (from 1999 to 2010) | n=1298    | 6–11 years-old                                                                                                                                 |

|                                    |      |                                                                   |                                                                                                                                                    |                                                               |                                                                                                                                        |                                                       |        |                                     |
|------------------------------------|------|-------------------------------------------------------------------|----------------------------------------------------------------------------------------------------------------------------------------------------|---------------------------------------------------------------|----------------------------------------------------------------------------------------------------------------------------------------|-------------------------------------------------------|--------|-------------------------------------|
| Kershenbaum et al <sup>32</sup>    | 2014 | International Journal of Environmental Research and Public Health | Exploration of preterm birth rates using the public health exposome database and computational analysis methods                                    | United States                                                 | [area-level]<br>Counties of greater than 100,000 persons                                                                               | 2003-2011                                             | n=520  | NA                                  |
| Labib et al <sup>33</sup>          | 2021 | Science of the Total Environment                                  | Estimating multiple greenspace exposure types and their associations with neighbourhood premature mortality: A socioecological study               | United Kingdom                                                | [area-level]<br>English Lower Super Output Area (LSOA) Census units                                                                    | Mortality data for the period 2008 to 2012            | n=1673 | NA                                  |
| Lau et al <sup>34</sup>            | 2018 | BMC Medicine                                                      | Determinants of the urinary and serum metabolome in children from six European populations                                                         | United Kingdom / France / Spain / Lithuania / Norway / Greece | Children recruited from the European HELIX cohort                                                                                      | Depends on the country sub-cohort (from 1999 to 2010) | n=1192 | 6-11 years old                      |
| Lee et al <sup>35</sup>            | 2017 | Environment International                                         | Identification of chemical mixtures to which Canadian pregnant women are exposed: The MIREC Study                                                  | Canada                                                        | Women from the Maternal-Infant Research on Environment Chemicals (MIREC) Study                                                         | 2008-2011                                             | n=1744 | 18-48 years old<br>median: 32 years |
| Levin-Schwartz et al <sup>36</sup> | 2019 | Environmental Health                                              | Time-varying associations between prenatal metal mixtures and rapid visual processing in children                                                  | Mexico                                                        | Mother-child pairs enrolled in the Programming Research in Obesity, Growth Environment and Social Stress (PROGRESS) birth cohort study | 2007-2011                                             | n=393  | 6-9 years old                       |
| Li et al <sup>37</sup>             | 2019 | Environmental Research                                            | Lifelong exposure to multiple stressors through different environmental pathways for European populations                                          | Italy                                                         | Individuals previously enrolled in the ITR (Italian Twin Registry)                                                                     | 2001                                                  | n=1510 | Up to 75 years old                  |
| Maitre et al <sup>38</sup>         | 2014 | BMC Medicine                                                      | Urinary metabolic profiles in early pregnancy are associated with preterm birth and fetal growth restriction in the Rhea mother-child cohort study | Greece                                                        | Mother-child pairs from the Rhea cohort                                                                                                | 2007                                                  | n=464  | New-borns                           |



|                             |          |                                      |                                                                                                                                                            |                                                               |                                                                                                           |                                                                          |                                                                    |                                       |
|-----------------------------|----------|--------------------------------------|------------------------------------------------------------------------------------------------------------------------------------------------------------|---------------------------------------------------------------|-----------------------------------------------------------------------------------------------------------|--------------------------------------------------------------------------|--------------------------------------------------------------------|---------------------------------------|
| Maitre et al <sup>39</sup>  | 2021     | Environment International            | Early-life environmental exposure determinants of child behavior in Europe: A longitudinal, population-based study                                         | United Kingdom / France / Spain / Lithuania / Norway / Greece | Children from the HELIX study                                                                             | Depends on the country sub-cohort; follow-up between 12/2013 and 02/2016 | n=1287                                                             | 6.5-11 years old<br>Mean age: 8 years |
| Maitre et al <sup>40</sup>  | 2018     | Environmental Science and Technology | Urine metabolic signatures of multiple environmental pollutants in pregnant women - an exposome approach                                                   | Spain                                                         | Women from the Sabadell subcohort & Gipuzkoa subcohort from INMA (Infancia y Medio Ambiente) birth cohort | 2004-2008                                                                | n=750                                                              | Median age: 30-31 years               |
| Martins et al <sup>41</sup> | 2021     | Neurobiology of Stress               | Childhood adversity correlates with stable changes in DNA methylation trajectories in children and converges with epigenetic signatures of prenatal stress | Germany                                                       | Children from the Berlin Longitudinal Child Study                                                         |                                                                          | n=173                                                              | 3–5 years old                         |
| Mueller et al <sup>42</sup> | 2020     | Environmental Research               | Urban greenspace and the indoor environment: Pathways to health via indoor particulate matter, noise, and road noise annoyance                             | United Kingdom / Netherlands / Greece                         | Households – HEALS project                                                                                | March 2015 – June 2016                                                   | n=131                                                              | NA                                    |
| Nielsen et al <sup>43</sup> | 2020     | Environmental Research               | Space-time hot spots of critically ill small for gestational age newborns and industrial air pollutants in major metropolitan areas of Canada              | Canada                                                        | Infants from neonatal admission data from the Canadian Neonatal Network                                   | 2006-2010                                                                | n=32,836                                                           | New-borns                             |
| Nielsen et al <sup>44</sup> | 2019 (a) | Science of the Total Environment     | Geographic information assessment of maternal ambient health hazards and adverse birth outcomes in Canada                                                  | Canada                                                        | Newborns from the Canadian Vital Statistics registered births file                                        | 2006-2012                                                                | n=2,525,645                                                        | New-borns                             |
| Nielsen et al <sup>45</sup> | 2019 (b) | Environmental Health Insights        | Spatiotemporal patterns of small for gestational age and low birth weight births and associations with land use and socioeconomic status                   | Canada                                                        | Neonates from Calgary and Edmonton Census Metropolitan Areas (Alberta)                                    | 2006-2010                                                                | n=121,259<br>Alberta Perinatal Health Program / n=4150<br>Canadian | NA                                    |

Neonatal Network

|                                     |      |                                                                   |                                                                                                                                             |                                                               |                                                                                |                                                                |                                   |                                           |
|-------------------------------------|------|-------------------------------------------------------------------|---------------------------------------------------------------------------------------------------------------------------------------------|---------------------------------------------------------------|--------------------------------------------------------------------------------|----------------------------------------------------------------|-----------------------------------|-------------------------------------------|
| Nieuwenhuijsen et al <sup>46</sup>  | 2019 | Environmental Health Perspectives                                 | Influence of the urban exposome on birth weight                                                                                             | United Kingdom / France / Spain / Lithuania / Norway / Greece | Singleton pregnancies from the European HELIX cohort                           | Depends on the country sub-cohort (from 1999 to 2010)          | n=31,458                          | New-borns                                 |
| North et al <sup>47</sup>           | 2017 | Annals of Allergy, Asthma and Immunology                          | The Kingston Allergy Birth Cohort - Exploring parentally reported respiratory outcomes through the lens of the exposome                     | Canada                                                        | Children from the Kingston Allergy Birth Cohort (KABC)                         |                                                                | n=560 prenatal<br>n=235 postnatal | 2 years old                               |
| Nowicki et al <sup>48</sup>         | 2018 | Frontiers in Psychology                                           | Early home-life antecedents of children's locus of control                                                                                  | United Kingdom                                                | Children from the Avon Longitudinal Study of Parents and Children (ALSPAC)     | Pregnant mother recruited between 1990-92                      | n=6381                            | 8 years old                               |
| Nwanaji-Enwerem et al <sup>49</sup> | 2021 | Aging (Albany NY)                                                 | Maternal adverse childhood experiences before pregnancy are associated with epigenetic aging changes in their children                      | United States                                                 | Children from the California, Salinas Valley CHAMACOS study                    | Pregnant mothers recruited between October 1999 – October 2000 | n=238                             | 7, 9, 14 years old                        |
| Ohanyan et al <sup>50</sup>         | 2022 | Environment International                                         | Machine learning approaches to characterize the obesogenic urban exposome                                                                   | Netherlands                                                   | Participants of the Occupational and Environmental Health Cohort study (AMIGO) | 2011-2012                                                      | n=14,829                          | 31-65 years<br>Mean age: 50.7 ± 9.4 years |
| Ourshalimian et al <sup>51</sup>    | 2019 | Environmental Research                                            | Arsenic and fasting blood glucose in the context of other drinking water chemicals: a cross-sectional study in Bangladesh                   | Bangladesh                                                    | Adults participating in the Bangladesh Demographic and Health Survey (BDHS)    | 2011                                                           | n=6587                            | ≥ 35 years old<br>Mean age: 53 years      |
| Oyana et al <sup>52</sup>           | 2015 | International Journal of Environmental Research and Public Health | Using an External Exposome Framework to Examine Pregnancy-Related Morbidities and Mortalities: Implications for Health Disparities Research | United States                                                 | [area-level]<br>Counties in the 48 contiguous USA                              | 2010-2014                                                      | n=3109                            | NA                                        |

|                                     |      |                                       |                                                                                                                                       |                                                                                                      |                                                                                            |                                                       |           |                                                                          |
|-------------------------------------|------|---------------------------------------|---------------------------------------------------------------------------------------------------------------------------------------|------------------------------------------------------------------------------------------------------|--------------------------------------------------------------------------------------------|-------------------------------------------------------|-----------|--------------------------------------------------------------------------|
| Patel et al <sup>53</sup>           | 2017 | International Journal of Epidemiology | Systematic correlation of environmental exposure and physiological and self-reported behaviour factors with leukocyte telomere length | United States                                                                                        | Participants from the National Health and Nutrition Examination Survey (NHANES) study      | waves 1999-2000 and 2001-02                           | n=7118    | Mean age: 52±20 years old                                                |
| Pino et al <sup>54</sup>            | 2017 | Environmental Research                | Human biomonitoring data analysis for metals in an Italian adolescents cohort: An exposome approach                                   | Italy                                                                                                | Adolescents from the PROgramme for Biomonitoring general population Exposure (PROBE) study | 2008-2009                                             | n=453     | 13-15 years old                                                          |
| Robinson et al <sup>55</sup>        | 2018 | Environmental Health Perspectives     | The urban exposome during pregnancy and its socioeconomic determinants                                                                | United Kingdom / France / Spain / Lithuania / Norway / Greece                                        | Mothers of singletons born between 1999 and 2010 from the HELIX study                      | Depends on the country sub-cohort (from 1999 to 2010) | n=28,045  | Mean age ranges from 27.8 to 32.6 years old according to the sub-cohorts |
| Saberi Hosnijeh et al <sup>56</sup> | 2020 | Cancer Epidemiology                   | Association between anthropometry and lifestyle factors and risk of B-cell lymphoma: An exposome-wide analysis                        | Denmark / France / Germany / Greece / Netherlands / Italy / Norway / United Kingdom / Spain / Sweden | Adults from the European Prospective Investigation into Nutrition and Cancer (EPIC) cohort | 1992-2000                                             | n=475,426 | 30-70 years old                                                          |
| Salles et al <sup>57</sup>          | 2021 | Science of the Total Environment      | Home-based informal jewelry production increases exposure of working families to cadmium                                              | Brazil                                                                                               | Participants living in Limeira, São Paulo state, Brazil                                    | 2017                                                  | n=192     | All age groups                                                           |
| Sarigiannis et al <sup>58</sup>     | 2018 | Epidemiologia e Prevenzione           | Addressing complexity of health impact assessment in industrially contaminated sites via the exposome paradigm                        | Greece                                                                                               | Children from the HERACLES (Waste Management) Greek cohort                                 | 2012                                                  | n=350     | 3-8 years old                                                            |
| Sarigiannis et al <sup>59</sup>     | 2021 | Environmental Research                | Neurodevelopmental exposome: The effect of in utero co-exposure to heavy metals and phthalates on child neurodevelopment              | Poland                                                                                               | Children from the Polish Mother and Child Cohort                                           | Pregnant mothers included in 2007                     | n=148     | 1 & 2 years old                                                          |

|                               |      |                                                                   |                                                                                                                                                   |                                                               |                                                                                                  |                                                        |                                                                |                                           |
|-------------------------------|------|-------------------------------------------------------------------|---------------------------------------------------------------------------------------------------------------------------------------------------|---------------------------------------------------------------|--------------------------------------------------------------------------------------------------|--------------------------------------------------------|----------------------------------------------------------------|-------------------------------------------|
| Sehgal et al <sup>60</sup>    | 2021 | International Journal of Environmental Research and Public Health | Neighborhood Exposures and Blood Pressure Outcomes: A Cross-Sectional Environmental Study among 19-53 Years-Old Parsis in Mumbai.                 | India                                                         | Adults from four Parsi neighbourhoods                                                            | 2017                                                   | n=1530                                                         | 19-53 years                               |
| Shaw et al <sup>61</sup>      | 2018 | Epidemiology                                                      | Residential agricultural pesticide exposures and risks of spontaneous preterm birth                                                               | United States                                                 | New-borns from Fresno, Kern, Kings, Madera, Merced, San Joaquin, Stanislaus, and Tulare counties | 1998-2011                                              | n=197,461 term control births and n=27,913 preterm case births | New-borns                                 |
| Steer et al <sup>62</sup>     | 2015 | PLOS One                                                          | Preconception and prenatal environmental factors associated with communication impairments in 9-year old children using an exposome-wide approach | United Kingdom                                                | Children from the Avon Longitudinal Study of Parents and Children (ALSPAC) study                 | born between 1st April 1991 and 31st December 1992     | n=7613                                                         | 9 years old                               |
| Stratakis et al <sup>63</sup> | 2020 | JAMA Network Open                                                 | Association of fish consumption and mercury exposure during pregnancy with metabolic health and inflammatory biomarkers in children               | United Kingdom / France / Spain / Lithuania / Norway / Greece | Mothers and their singleton child from the HELIX study                                           | 2003-2009 (follow-up 2013-2016)                        | n=805                                                          | 6-12 years old<br>Mean age: 8.4±1.5 years |
| Travis et al <sup>64</sup>    | 2020 | Science of the Total Environment                                  | Catching flame retardants and pesticides in silicone wristbands: Evidence of exposure to current and legacy pollutants in Uruguayan children      | Uruguay                                                       | Participants of the Scola-Exposome study                                                         | 2018                                                   | n=24                                                           | 6-7.8 years old                           |
| Vrijheid et al <sup>65</sup>  | 2020 | Environmental Health Perspectives                                 | Early-life environmental exposures and childhood obesity: An exposome-wide approach                                                               | United Kingdom / France / Spain / Lithuania / Norway / Greece | Mother-child pairs from the HELIX study                                                          | Depends on the country sub-cohort; follow-up 2013-2016 | n=1,301                                                        | 6-11 years old                            |
| Wan et al <sup>66</sup>       | 2021 | Journal of Exposure Science & Environmental Epidemiology          | Indoor exposure to phthalates and polycyclic aromatic hydrocarbons (PAHs) to Canadian children: the Kingston allergy birth cohort.                | Canada                                                        | Children from The Kingston Allergy Birth Cohort                                                  | Dust sampling from June 24, 2014 to February 25, 2015  | n=79                                                           | 18 months to 14 years old                 |

|                                  |      |                                                                   |                                                                                                                                        |                                                               |                                                                       |                                                        |             |                                              |
|----------------------------------|------|-------------------------------------------------------------------|----------------------------------------------------------------------------------------------------------------------------------------|---------------------------------------------------------------|-----------------------------------------------------------------------|--------------------------------------------------------|-------------|----------------------------------------------|
| Warembourg et al <sup>67</sup>   | 2019 | Journal of the American College of Cardiology                     | Early-life environmental exposures and blood pressure in children                                                                      | United Kingdom / France / Spain / Lithuania / Norway / Greece | Children from the European HELIX cohort                               | Depends on the country sub-cohort; follow-up 2014-2015 | n=1,277     | 6.5-11 years old<br>Mean 8 years             |
| Wheeler et al <sup>68</sup>      | 2021 | International Journal of Environmental Research and Public Health | Assessment of grouped weighted quantile sum regression for modeling chemical mixtures and cancer risk                                  | United States                                                 | Participants to the California Childhood Leukemia Study               | 1995-2012                                              | n=564       | <8 years old at diagnosis                    |
| Yan et al <sup>69</sup>          | 2019 | Environment International                                         | Maternal serum metabolome and traffic-related air pollution exposure in pregnancy                                                      | United States                                                 | Women with registered live births in California Central Valley region | Children born between 2005 and 2010                    | n=160       | Median age: 25 years old                     |
| Yan et al <sup>70</sup>          | 2021 | Chemical Research in Toxicology                                   | High-resolution metabolomic assessment of pesticide exposure in Central Valley, California                                             | United States                                                 | Older adults living in the California Central Valley                  | 2001-2007                                              | n=176       | 35-92 years old<br>Mean age: 66.1±13.4 years |
| Yang et al <sup>71</sup>         | 2015 | Human Reproduction                                                | Association of serum levels of typical organic pollutants with polycystic ovary syndrome (PCOS): a case-control study                  | China                                                         | Han women from Northern China                                         | 2012                                                   | n=80        | Mean age: 30±3 years                         |
| Yitshak-Sade et al <sup>72</sup> | 2020 | International Journal of Environmental Research and Public Health | Estimating the combined effects of natural and built environmental exposures on birthweight among urban residents in Massachusetts     | United States                                                 | Singleton live births in Massachusetts                                | 2001-2011                                              | n = 150,665 | New-borns                                    |
| Young et al <sup>73</sup>        | 2021 | Environment International                                         | Chemical contaminant exposures assessed using silicone wristbands among occupants in office buildings in the USA, UK, China, and India | United States / United Kingdom / China / India                | Workers of the pre-existing Global CogFx Study cohort                 | 2019                                                   | n=251       | 18-65 years                                  |

**Table S2: Use of social variables**

| Exposure                             | Confounder                           | Exposure<br>+<br>Confounder         | Descriptive                     | Effect-modifier           | Exposure<br>+<br>Effect-modifier | Confounder<br>+<br>Effect-modifier | Exposure<br>/ confounder<br>+ descriptive |
|--------------------------------------|--------------------------------------|-------------------------------------|---------------------------------|---------------------------|----------------------------------|------------------------------------|-------------------------------------------|
| N=22                                 | N=15                                 | N=18                                | N=5                             | N=2                       | N=1                              | N=2                                | N=8                                       |
| Bergmann et al <sup>5</sup>          | Bennett et al <sup>4</sup>           | Agier et al <sup>1</sup>            | Chung et al <sup>9</sup>        | Fishe et al <sup>19</sup> | Barzilay et al <sup>3</sup>      | Labib et al <sup>33</sup>          | Andrianou et al <sup>2</sup>              |
| Bueckers et al <sup>6</sup>          | Colicino et al 2020 <sup>12</sup>    | Calamendrei et al <sup>7</sup>      | Ferreira et al <sup>18</sup>    | Li et al <sup>37</sup>    |                                  | Stratakis et al <sup>63</sup>      | Cifuentes et al <sup>10</sup>             |
| Doherty et al <sup>14</sup>          | Colicino et al 2021 <sup>11</sup>    | Choi et al <sup>8</sup>             | Maitre et al 2018 <sup>40</sup> |                           |                                  |                                    | Golding et al 2018 <sup>23</sup>          |
| Dreno et al <sup>15</sup>            | Gagliardi et al <sup>20</sup>        | De Prado-Bert <sup>13</sup>         | Travis et al <sup>64</sup>      |                           |                                  |                                    | Guillien et al <sup>26</sup>              |
| Eyles et al <sup>17</sup>            | Lau et al <sup>34</sup>              | Erzin et al <sup>16</sup>           | Young et al <sup>73</sup>       |                           |                                  |                                    | Maitre et al 2014 <sup>38</sup>           |
| Georgopoulos et al <sup>21</sup>     | Levin-Schwartz et al <sup>36</sup>   | Granum et al <sup>25</sup>          |                                 |                           |                                  |                                    | Maitre et al 2021 <sup>39</sup>           |
| Gittner et al <sup>22</sup>          | Mueller et al <sup>42</sup>          | Hu et al <sup>28</sup>              |                                 |                           |                                  |                                    | Salles et al <sup>57</sup>                |
| Golding et al 2017 <sup>24</sup>     | Nielsen et al 2020 <sup>43</sup>     | Juarez et al <sup>30</sup>          |                                 |                           |                                  |                                    | Yan et al 2019 <sup>69</sup>              |
| Guo et al <sup>27</sup>              | Nielsen et al 2019 (a) <sup>44</sup> | Julvez et al <sup>31</sup>          |                                 |                           |                                  |                                    |                                           |
| Huang et al <sup>29</sup>            | Nieuwenhuijsen et al <sup>46</sup>   | Nwanaji-Enwerem et al <sup>49</sup> |                                 |                           |                                  |                                    |                                           |
| Kershenbaum et al <sup>32</sup>      | Ourshalimian et al <sup>51</sup>     | Ohanyan et al <sup>50</sup>         |                                 |                           |                                  |                                    |                                           |
| Lee et al <sup>35</sup>              | Wan et al <sup>66</sup>              | Patel et al <sup>53</sup>           |                                 |                           |                                  |                                    |                                           |
| Martins et al <sup>41</sup>          | Wheeler et al <sup>68</sup>          | Robinson et al <sup>55</sup>        |                                 |                           |                                  |                                    |                                           |
| Nielsen et al 2019 (b) <sup>45</sup> | Yan et al 2021 <sup>70</sup>         | Sehgal et al <sup>60</sup>          |                                 |                           |                                  |                                    |                                           |
| North et al <sup>47</sup>            | Yang et al <sup>71</sup>             | Shaw et al <sup>61</sup>            |                                 |                           |                                  |                                    |                                           |
| Nowicki et al <sup>48</sup>          |                                      | Vrijheid et al <sup>65</sup>        |                                 |                           |                                  |                                    |                                           |
| Oyana et al <sup>52</sup>            |                                      | Warembourg et al <sup>67</sup>      |                                 |                           |                                  |                                    |                                           |
| Pino et al <sup>54</sup>             |                                      | Yitshak-Sade et al <sup>72</sup>    |                                 |                           |                                  |                                    |                                           |
| Saberi Hosnijeh et al <sup>56</sup>  |                                      |                                     |                                 |                           |                                  |                                    |                                           |
| Sarigiannis et al 2018 <sup>58</sup> |                                      |                                     |                                 |                           |                                  |                                    |                                           |
| Sarigiannis et al 2021 <sup>59</sup> |                                      |                                     |                                 |                           |                                  |                                    |                                           |
| Steer et al <sup>62</sup>            |                                      |                                     |                                 |                           |                                  |                                    |                                           |

**Table S3: Nature, frequency and use of the social variables**

|                                                                              | Frequency | Exposure | Confounder* | Effect-modifier** | Description | Confounder + effect-modifier | Exposure + effect-modifier | Exposure + confounder |
|------------------------------------------------------------------------------|-----------|----------|-------------|-------------------|-------------|------------------------------|----------------------------|-----------------------|
| <b>INDIVIDUAL CHARACTERISTICS – 36.8%</b>                                    | N=105     |          |             |                   |             |                              |                            |                       |
| Education                                                                    | 24        | 8        | 10          | 1                 | 5           |                              |                            |                       |
| Race / ethnicity                                                             | 19        | 3        | 12          | 1                 | 3           |                              |                            |                       |
| Occupation / social class                                                    | 9         | 3        | 3           |                   | 3           |                              |                            |                       |
| Childhood adversity                                                          | 7         | 6        | 1           |                   |             |                              |                            |                       |
| <b>Psychosocial factors</b><br>(stress, social support, contact, engagement) | 6         | 5        | 1           |                   |             |                              |                            |                       |
| Rural / Urban                                                                | 6         | 2        | 4           |                   |             |                              |                            |                       |
| Country of birth                                                             | 5         | 1        | 2           |                   | 2           |                              |                            |                       |
| Income                                                                       | 4         | 2        |             |                   | 2           |                              |                            |                       |
| Employment status                                                            | 4         |          | 2           |                   | 2           |                              |                            |                       |
| Government support                                                           | 3         | 1        | 2           |                   |             |                              |                            |                       |
| Housing                                                                      | 3         | 2        | 1           |                   |             |                              |                            |                       |

|                                                                    |             |    |   |   |   |
|--------------------------------------------------------------------|-------------|----|---|---|---|
| Wealth (material)                                                  | 2           | 1  |   | 1 |   |
| Working conditions                                                 | 2           |    |   | 2 |   |
| Paid child care                                                    | 2           | 2  |   |   |   |
| Traumatic life experiences (lifecourse)                            | 2           | 1  | 1 |   |   |
| Migration status                                                   | 1           |    | 1 |   |   |
| Individual socioeconomic status                                    | 1           | 1  |   |   |   |
| Poverty                                                            | 1           |    | 1 |   |   |
| Food security                                                      | 1           |    | 1 |   |   |
| Financial constraint in access to care                             | 1           | 1  |   |   |   |
| Perception of neighbourhood security                               | 1           | 1  |   |   |   |
| Verbal discrimination                                              | 1           | 1  |   |   |   |
| <b>AREA-LEVEL CHARACTERISTICS – 28.1%</b>                          | <b>N=80</b> |    |   |   |   |
| <b>Financial difficulties</b>                                      |             |    |   |   |   |
| (food (in)security, government support, poverty, health insurance) | 16          | 13 | 1 |   | 2 |
| <b>Neighbourhood socioeconomic status</b>                          |             |    |   |   |   |
| (deprivation & economic segregation)                               | 12          | 6  | 3 | 2 | 1 |



|                                                                                                  |   |   |   |
|--------------------------------------------------------------------------------------------------|---|---|---|
| Race / ethnicity                                                                                 | 9 | 8 | 1 |
| Income                                                                                           | 8 | 7 | 1 |
| <b>Violence / safety</b><br>(crime rate, homicide rate, injury deaths, robbery)                  | 7 | 6 | 1 |
| Education                                                                                        | 5 | 5 |   |
| <b>Social</b><br>(social capital, social support, single parent household, linguistic isolation) | 5 | 5 |   |
| Housing difficulties / accessibility                                                             | 4 | 3 | 1 |
| Employment                                                                                       | 3 | 2 | 1 |
| Segregation (spatial proximity)                                                                  | 2 | 2 |   |
| Rural / Urban                                                                                    | 2 | 2 |   |
| Access to facilities (medical, educational, recreational)                                        | 1 | 1 |   |
| Literacy                                                                                         | 1 | 1 |   |
| Vulnerable populations                                                                           | 1 | 1 |   |
| Wealth                                                                                           | 1 | 1 |   |

|                                         |             |   |    |   |   |   |
|-----------------------------------------|-------------|---|----|---|---|---|
| House crowding                          | 1           | 1 |    |   |   |   |
| Occupation                              | 1           | 1 |    |   |   |   |
| Maternal education                      | 1           | 1 |    |   |   |   |
| <b>PARENTAL CHARACTERISTICS – 20.7%</b> | <b>N=59</b> |   |    |   |   |   |
| Education                               | 31          | 9 | 17 | 3 | 1 | 1 |
| Race / ethnicity                        | 7           | 4 | 3  |   |   |   |
| Parental country of birth               | 6           |   | 6  |   |   |   |
| Occupation                              | 4           | 4 |    |   |   |   |
| Maternal stress                         | 3           | 1 | 2  |   |   |   |
| Employment                              | 2           | 2 |    |   |   |   |
| Parental adverse life events            | 2           | 2 |    |   |   |   |
| Parental socioeconomic status           | 1           | 1 |    |   |   |   |
| Maternal migration                      | 1           |   | 1  |   |   |   |
| Maternal social class                   | 1           | 1 |    |   |   |   |
| Maternal health insurance               | 1           |   | 1  |   |   |   |

| <b>FAMILY / HOUSEHOLD CHARACTERISTICS – 14.4%</b>                                                   |            |              |              |             |             |             |             |             |
|-----------------------------------------------------------------------------------------------------|------------|--------------|--------------|-------------|-------------|-------------|-------------|-------------|
|                                                                                                     | N=41       |              |              |             |             |             |             |             |
| <b>Material conditions</b><br>(Family affluence score, income, wealth, financial hardship)          | 14         | 9            | 4            |             |             |             |             | 1           |
| <b>Social network</b><br>(Family contact with family-friends, social participation, social network) | 14         | 14           |              |             |             |             |             |             |
| <b>Living conditions</b><br>(House crowding, family structure, number of inhabitants)               | 9          | 7            | 1            |             | 1           |             |             |             |
| <b>Socioeconomic status</b><br>(Family / household)                                                 | 3          | 2            | 1            |             |             |             |             |             |
| Family adversity index                                                                              | 1          | 1            |              |             |             |             |             |             |
| <b>N total</b>                                                                                      | <b>285</b> | <b>164</b>   | <b>85</b>    | <b>4</b>    | <b>27</b>   | <b>1</b>    | <b>1</b>    | <b>3</b>    |
| <b>%</b>                                                                                            |            | <b>57.5%</b> | <b>29.8%</b> | <b>1.4%</b> | <b>9.5%</b> | <b>0.4%</b> | <b>0.4%</b> | <b>1.1%</b> |

\* A confounder causes both the exposure and outcome of interest.

\*\* An effect-modifier modulates the effect of an exposure on the outcome according to the level of this variable.

This table was used to build the word cloud (Figure 2).

**Table S4: Social hypotheses and mechanisms**

| Agnostic approach                    |                                      | Hypothesis-driven approach          |                                      |                                  |                                      | Mixed approaches                 |
|--------------------------------------|--------------------------------------|-------------------------------------|--------------------------------------|----------------------------------|--------------------------------------|----------------------------------|
|                                      |                                      | Social hypothesis in intro = YES    |                                      | Social hypothesis in intro = NO  |                                      |                                  |
| Classical                            | Mentioning social features           | Social mechanism in discussion      | No social mechanism in discussion    | Social mechanism in discussion   | No social mechanism in discussion    |                                  |
| N=20                                 | N=16                                 | N=7                                 | N=5                                  | N=1                              | N=22                                 | N=2                              |
| Andrianou et al <sup>2</sup>         | Agier et al <sup>1</sup>             | Barzilay et al <sup>3</sup>         | Colicino et al 2020 <sup>12</sup>    | Yitshak-Sade et al <sup>72</sup> | Bennett et al <sup>4</sup>           | Georgopoulos et al <sup>21</sup> |
| Cal amandrei et al <sup>7</sup>      | Choi et al <sup>8</sup>              | Bergmann et al <sup>5</sup>         | Erzin et al <sup>16</sup>            |                                  | Chung et al <sup>9</sup>             | Juarez et al <sup>30</sup>       |
| Colicino et al 2021 <sup>11</sup>    | Cifuentes et al <sup>10</sup>        | Buekers et al <sup>6</sup>          | Fishe et al <sup>19</sup>            |                                  | Doherty et al <sup>14</sup>          |                                  |
| De Prado-Bert et al <sup>13</sup>    | Gittner et al 2017 <sup>22</sup>     | Eyles et al <sup>17</sup>           | Labib et al <sup>33</sup>            |                                  | Dreno et al <sup>15</sup>            |                                  |
| Granum et al <sup>25</sup>           | Golding et al 2018 <sup>23</sup>     | Martins et al <sup>41</sup>         | Nielsen et al 2019 (b) <sup>45</sup> |                                  | Ferreira et al <sup>18</sup>         |                                  |
| Guillien et al <sup>26</sup>         | Golding et al 2017 <sup>24</sup>     | Nwanaji-Enwerem et al <sup>49</sup> |                                      |                                  | Gagliardi et al <sup>20</sup>        |                                  |
| Guo et al <sup>27</sup>              | Julvez et al <sup>31</sup>           | Sehgal et al <sup>60</sup>          |                                      |                                  | Lau et al <sup>34</sup>              |                                  |
| Hu et al <sup>28</sup>               | Kershenbaum et al <sup>32</sup>      |                                     |                                      |                                  | Lee et al <sup>35</sup>              |                                  |
| Huang et al <sup>29</sup>            | Maitre et al 2021 <sup>39</sup>      |                                     |                                      |                                  | Levin-Schwartz et al <sup>36</sup>   |                                  |
| Maitre et al 2014 <sup>38</sup>      | Ohanyan et al <sup>50</sup>          |                                     |                                      |                                  | Li et al <sup>37</sup>               |                                  |
| Nieuwenhuijsen et al <sup>46</sup>   | Oyana et al <sup>52</sup>            |                                     |                                      |                                  | Maitre et al 2018 <sup>40</sup>      |                                  |
| North et al <sup>47</sup>            | Robinson et al <sup>55</sup>         |                                     |                                      |                                  | Mueller et al <sup>42</sup>          |                                  |
| Nowicki et al <sup>48</sup>          | Saberi Hosnijeh et al <sup>56</sup>  |                                     |                                      |                                  | Nielsen et al 2020 <sup>43</sup>     |                                  |
| Patel et al <sup>53</sup>            | Sarigiannis et al 2018 <sup>58</sup> |                                     |                                      |                                  | Nielsen et al 2019 (a) <sup>44</sup> |                                  |
| Pino et al <sup>54</sup>             | Steer et al <sup>62</sup>            |                                     |                                      |                                  | Ourshalimian et al <sup>51</sup>     |                                  |
| Sarigiannis et al 2021 <sup>59</sup> | Warembourg et al <sup>67</sup>       |                                     |                                      |                                  | Sal les et al <sup>57</sup>          |                                  |
| Vrijheid et al <sup>65</sup>         |                                      |                                     |                                      |                                  | Shaw et al <sup>61</sup>             |                                  |
| Wheeler et al <sup>68</sup>          |                                      |                                     |                                      |                                  | Stratakis et al <sup>63</sup>        |                                  |
| Yan et al 2021 <sup>70</sup>         |                                      |                                     |                                      |                                  | Travis et al <sup>64</sup>           |                                  |
| Young et al <sup>73</sup>            |                                      |                                     |                                      |                                  | Wan et al <sup>66</sup>              |                                  |
|                                      |                                      |                                     |                                      |                                  | Yan et al 2019 <sup>69</sup>         |                                  |
|                                      |                                      |                                     |                                      |                                  | Yang et al <sup>71</sup>             |                                  |

This table was used to build the Figure 2.

## References

1. Agier L, Basagana X, Maitre L, et al. Early-life exposome and lung function in children in Europe: an analysis of data from the longitudinal, population-based HELIX cohort. *Lancet Planetary Health*. 2019;3(2):E81-E92. doi:10.1016/S2542-5196(19)30010-5
2. Andrianou XD, Van Der Lek C, Charisiadis P, et al. Application of the urban exposome framework using drinking water and quality of life indicators: A proof-of-concept study in Limassol, Cyprus. *PeerJ*. 2019;2019(5). doi:10.7717/peerj.6851
3. Barzilay R, Moore TM, Calkins ME, et al. Deconstructing the role of the exposome in youth suicidal ideation: Trauma, neighborhood environment, developmental and gender effects. *Neurobiol Stress*. 2021;14:100314. doi:10.1016/j.ynstr.2021.100314
4. Bennett B, Workman T, Smith MN, Griffith WC, Thompson B, Faustman EM. Characterizing the Neurodevelopmental Pesticide Exposome in a Children's Agricultural Cohort. *Int J Environ Res Public Health*. 2020;17(5). doi:10.3390/ijerph17051479
5. Bergmann AJ, North PE, Vasquez L, Bello H, Gastanaga Ruiz M del C, Anderson KA. Multi-class chemical exposure in rural Peru using silicone wristbands. *J Expo Sci Environ Epidemiol*. 2017;27(6):560-568. doi:10.1038/jes.2017.12
6. Buekers J, Colles A, Cornelis C, Morrens B, Govarts E, Schoeters G. Socio-economic status and health: Evaluation of human biomonitoring chemical exposure to per- and polyfluorinated substances across status. *Int J Environ Res Public Health*. 2018;15(12). doi:10.3390/ijerph15122818
7. Calamandrei G, Ricceri L, Meccia E, et al. Pregnancy exposome and child psychomotor development in three European birth cohorts. *Environ Res*. 2020;181:108856. doi:10.1016/j.envres.2019.108856
8. Choi KW, Stein MB, Nishimi KM, et al. An Exposure-Wide and Mendelian Randomization Approach to Identifying Modifiable Factors for the Prevention of Depression. *Am J Psychiatry*. 2020;177(10):944-954. doi:10.1176/appi.ajp.2020.19111158
9. Chung MK, Kannan K, Louis GM, Patel CJ. Toward Capturing the Exposome: Exposure Biomarker Variability and Coexposure Patterns in the Shared Environment. *Environ Sci Technol*. 2018;52(15):8801-8810. doi:10.1021/acs.est.8b01467
10. Cifuentes P, Reichard J, Im W, et al. Application of the Public Health Exposome Framework to Estimate Phenotypes of Resilience in a Model Ohio African-American Women's Cohort. *J Urban Health*. 2019;96:57-71. doi:10.1007/s11524-018-00338-w
11. Colicino E, Ferrari F, Cowell W, et al. Non-linear and non-additive associations between the pregnancy metabolome and birthweight. *Environ Int*. 2021;156:106750. doi:10.1016/j.envint.2021.106750
12. Colicino E, Cowell W, Bozack A, et al. Association between prenatal immune phenotyping and cord blood leukocyte telomere length in the PRISM pregnancy cohort. *Environ Res*. 2020;191:110113. doi:10.1016/j.envres.2020.110113
13. de Prado-Bert P, Ruiz-Arenas C, Vives-Usano M, et al. The early-life exposome and epigenetic age acceleration in children. *Environ Int*. 2021;155:106683. doi:10.1016/j.envint.2021.106683

14. Doherty BT, Pearce JL, Anderson KA, Karagas MR, Romano ME. Assessment of Multipollutant Exposures During Pregnancy Using Silicone Wristbands. *Front Public Health*. 2020;8:547239. doi:10.3389/fpubh.2020.547239
15. Dreno B, Shourick J, Kerob D, Bouloc A, Taïeb C. The role of exposome in acne: results from an international patient survey. *J Eur Acad Dermatol Venereol*. 2020;34(5):1057-1064. doi:10.1111/jdv.16119
16. Erzin G, Pries LK, Dimitrakopoulos S, et al. Association between exposome score for schizophrenia and functioning in first-episode psychosis: results from the Athens first-episode psychosis research study. *Psychol Med*. 2021:1-10. doi:10.1017/S0033291721004542
17. Eyles E, Manley D, Jones K. Occupied with classification: Which occupational classification scheme better predicts health outcomes? *Soc Sci Med*. 2019;227:56-62. doi:10.1016/j.socscimed.2018.09.020
18. Ferrreira APS da S, Pereira EC, Salles FJ, et al. Home-based and informal work exposes the families to high levels of potentially toxic elements. *Chemosphere*. 2019;218:319-327. doi:10.1016/j.chemosphere.2018.11.083
19. Fishe J, Zheng Y, Lyu T, Bian J, Hu H. Environmental effects on acute exacerbations of respiratory diseases: A real-world big data study. *Sci Total Environ*. 2022;806:150352. doi:10.1016/j.scitotenv.2021.150352
20. Gagliardi A, Dugué PA, Nøst TH, et al. Stochastic Epigenetic Mutations Are Associated with Risk of Breast Cancer, Lung Cancer, and Mature B-cell Neoplasms. *Cancer Epidemiol Biomarkers Prev*. 2020;29(10):2026-2037. doi:10.1158/1055-9965.EPI-20-0451
21. Georgopoulos PG, Brinkerhoff CJ, Isukapalli S, Dellarco M, Landrigan PJ, Liroy PJ. A tiered framework for risk-relevant characterization and ranking of chemical exposures: applications to the National Children's Study (NCS). *Risk Anal*. 2014;34(7):1299-1316. doi:10.1111/risa.12165
22. Gittner LS, Kilbourne BJ, Vadapalli R, Khan HMK, Langston MA. A multifactorial obesity model developed from nationwide public health exposome data and modern computational analyses. *Obes Res Clin Pract*. 2017;11(5):522-533. doi:10.1016/j.orcp.2017.05.001
23. Golding J, Iles-Caven Y, Ellis G, Gregory S, Nowicki S. Are the early childhood antecedents of men's external locus of control similar to those of their female partners? *Wellcome Open Res*. 2018;3:28. doi:10.12688/wellcomeopenres.14098.1
24. Golding J, Gregory S, Iles-Caven Y, Nowicki S. The mid-childhood and adolescent antecedents of women's external locus of control orientation. *Wellcome Open Res*. 2017;2:53. doi:10.12688/wellcomeopenres.12052.2
25. Granum B, Oftedal B, Agier L, et al. Multiple environmental exposures in early-life and allergy-related outcomes in childhood. *Environ Int*. 2020;144:106038. doi:10.1016/j.envint.2020.106038
26. Guillien A, Lepeule J, Seyve E, et al. Profile of exposures and lung function in adults with asthma: An exposome approach in the EGEA study. *Environ Res*. 2021;196:110422. doi:10.1016/j.envres.2020.110422
27. Guo P, Lin EZ, Koelmel JP, et al. Exploring personal chemical exposures in China with wearable air pollutant monitors: A repeated-measure study in healthy older adults in Jinan, China. *Environ Int*. 2021;156:106709. doi:10.1016/j.envint.2021.106709

28. Hu H, Zhao J, Savitz DA, Prosperi M, Zheng Y, Pearson TA. An external exposome-wide association study of hypertensive disorders of pregnancy. *Environ Int.* 2020;141:105797. doi:10.1016/j.envint.2020.105797
29. Huang SY, Yang YX, Chen SD, et al. Investigating causal relationships between exposome and human longevity: a Mendelian randomization analysis. *BMC Med.* 2021;19(1):150. doi:10.1186/s12916-021-02030-4
30. Juarez PD, Hood DB, Rogers GL, et al. A novel approach to analyzing lung cancer mortality disparities: Using the exposome and a graph-theoretical toolchain. *Environ Dis.* 2017;2(2):33-44.
31. Julvez J, López-Vicente M, Warembourg C, et al. Early life multiple exposures and child cognitive function: A multi-centric birth cohort study in six European countries. *Environ Pollut.* 2021;284:117404. doi:10.1016/j.envpol.2021.117404
32. Kershenbaum AD, Langston MA, Levine RS, et al. Exploration of preterm birth rates using the public health exposome database and computational analysis methods. *Int J Environ Res Public Health.* 2014;11(12):12346-12366. doi:10.3390/ijerph111212346
33. Labib SM, Lindley S, Huck JJ. Estimating multiple greenspace exposure types and their associations with neighbourhood premature mortality: A socioecological study. *Sci Total Environ.* 2021;789:147919. doi:10.1016/j.scitotenv.2021.147919
34. Lau CHE, Siskos AP, Maitre L, et al. Determinants of the urinary and serum metabolome in children from six European populations. *BMC Med.* 2018;16(1):202. doi:10.1186/s12916-018-1190-8
35. Lee WC, Fisher M, Davis K, Arbuckle TE, Sinha SK. Identification of chemical mixtures to which Canadian pregnant women are exposed: The MIREC Study. *Environ Int.* 2017;99:321-330. doi:10.1016/j.envint.2016.12.015
36. Levin-Schwartz Y, Gennings C, Schnaas L, et al. Time-varying associations between prenatal metal mixtures and rapid visual processing in children. *Environ Health.* 2019;18(1):92. doi:10.1186/s12940-019-0526-y
37. Li N, Friedrich R, Maesano CN, et al. Lifelong exposure to multiple stressors through different environmental pathways for European populations. *Environ Res.* 2019;179(Pt A):108744. doi:10.1016/j.envres.2019.108744
38. Maitre L, Fthenou E, Athersuch T, et al. Urinary metabolic profiles in early pregnancy are associated with preterm birth and fetal growth restriction in the Rhea mother-child cohort study. *BMC Med.* 2014;12:110. doi:10.1186/1741-7015-12-110
39. Maitre L, Julvez J, López-Vicente M, et al. Early-life environmental exposure determinants of child behavior in Europe: A longitudinal, population-based study. *Environ Int.* 2021;153:106523. doi:10.1016/j.envint.2021.106523
40. Maitre L, Robinson O, Martinez D, et al. Urine Metabolic Signatures of Multiple Environmental Pollutants in Pregnant Women: An Exposome Approach. *Environ Sci Technol.* 2018;52(22):13469-13480. doi:10.1021/acs.est.8b02215
41. Martins J, Czamara D, Sauer S, et al. Childhood adversity correlates with stable changes in DNA methylation trajectories in children and converges with epigenetic signatures of prenatal stress. *Neurobiol Stress.* 2021;15:100336. doi:10.1016/j.ynstr.2021.100336

42. Mueller W, Steinle S, Pärkkä J, et al. Urban greenspace and the indoor environment: Pathways to health via indoor particulate matter, noise, and road noise annoyance. *Environ Res.* 2020;180:108850. doi:10.1016/j.envres.2019.108850
43. Nielsen CC, Amrhein CG, Shah PS, Stieb DM, Osornio-Vargas AR. Space-time hot spots of critically ill small for gestational age newborns and industrial air pollutants in major metropolitan areas of Canada. *Environ Res.* 2020;186:109472. doi:10.1016/j.envres.2020.109472
44. Nielsen CC, Amrhein CG, Serrano-Lomelin JA, Osornio-Vargas AR. Geographic information assessment of maternal ambient health hazards and adverse birth outcomes in Canada. *Sci Total Environ.* 2019;696:134091. doi:10.1016/j.scitotenv.2019.134091
45. Nielsen CC, Amrhein CG, Shah PS, Aziz K, Osornio-Vargas AR. Spatiotemporal Patterns of Small for Gestational Age and Low Birth Weight Births and Associations With Land Use and Socioeconomic Status. *Environ Health Insights.* 2019;13:1178630219869922. doi:10.1177/1178630219869922
46. Nieuwenhuijsen MJ, Agier L, Basagaña X, et al. Influence of the Urban Exposome on Birth Weight. *Environ Health Perspect.* 2019;127(4):47007. doi:10.1289/EHP3971
47. North ML, Brook JR, Lee EY, et al. The Kingston Allergy Birth Cohort: Exploring parentally reported respiratory outcomes through the lens of the exposome. *Ann Allergy Asthma Immunol.* 2017;118(4):465-473. doi:10.1016/j.anai.2017.01.002
48. Nowicki S, Gregory S, Iles-Caven Y, Ellis G, Golding J. Early Home-Life Antecedents of Children's Locus of Control. *Front Psychol.* 2018;9:2032. doi:10.3389/fpsyg.2018.02032
49. Nwanaji-Enwerem JC, Laan LVD, Kogut K, et al. Maternal adverse childhood experiences before pregnancy are associated with epigenetic aging changes in their children. *Aging.* 2021;13(24):25653-25669. doi:10.18632/aging.203776
50. Ohanyan H, Portengen L, Huss A, et al. Machine learning approaches to characterize the obesogenic urban exposome. *Environ Int.* 2022;158:107015. doi:10.1016/j.envint.2021.107015
51. Ourshalimian S, Naser AM, Rahman M, et al. Arsenic and fasting blood glucose in the context of other drinking water chemicals: a cross-sectional study in Bangladesh. *Environ Res.* 2019;172:249-257. doi:10.1016/j.envres.2018.12.049
52. Oyana TJ, Matthews-Juarez P, Cormier SA, Xu X, Juarez PD. Using an External Exposome Framework to Examine Pregnancy-Related Morbidities and Mortalities: Implications for Health Disparities Research. *Int J Environ Res Public Health.* 2015;13(1):ijerph13010013. doi:10.3390/ijerph13010013
53. Patel CJ, Manrai AK, Corona E, Kohane IS. Systematic correlation of environmental exposure and physiological and self-reported behaviour factors with leukocyte telomere length. *Int J Epidemiol.* 2017;46(1):44-56. doi:10.1093/ije/dyw043
54. Pino A, Chiarotti F, Calamandrei G, et al. Human biomonitoring data analysis for metals in an Italian adolescents cohort: An exposome approach. *Environ Res.* 2017;159:344-354. doi:10.1016/j.envres.2017.08.012
55. Robinson O, Tamayo I, de Castro M, et al. The Urban Exposome during Pregnancy and Its Socioeconomic Determinants. *Environ Health Perspect.* 2018;126(7):077005. doi:10.1289/EHP2862



56. Saberi Hosnijeh F, Casabonne D, Nieters A, et al. Association between anthropometry and lifestyle factors and risk of B-cell lymphoma: An exposome-wide analysis. *Int J Cancer*. 2021;148(9):2115-2128. doi:10.1002/ijc.33369
57. Salles FJ, Tavares DJB, Freire BM, et al. Home-based informal jewelry production increases exposure of working families to cadmium. *Sci Total Environ*. 2021;785:147297. doi:10.1016/j.scitotenv.2021.147297
58. Sarigiannis DA, Karakitsios SP. Addressing complexity of health impact assessment in industrially contaminated sites via the exposome paradigm. *Epidemiol Prev*. 2018;42(5-6S1):37-48. doi:10.19191/EP18.5-6.S1.P037.086
59. Sarigiannis DA, Papaioannou N, Handakas E, et al. Neurodevelopmental exposome: The effect of in utero co-exposure to heavy metals and phthalates on child neurodevelopment. *Environ Res*. 2021;197:110949. doi:10.1016/j.envres.2021.110949
60. Sehgal H, Toscano WA. Neighborhood Exposures and Blood Pressure Outcomes: A Cross-Sectional Environmental Study among 19–53 Years-Old Parsis in Mumbai. *Int Journal Environ Res Public Health*. 2021;18(16):8594. doi:10.3390/ijerph18168594
61. Shaw GM, Yang W, Roberts EM, et al. Residential Agricultural Pesticide Exposures and Risks of Spontaneous Preterm Birth. *Epidemiology*. 2018;29(1):8-21. doi:10.1097/EDE.0000000000000757
62. Steer CD, Bolton P, Golding J. Preconception and prenatal environmental factors associated with communication impairments in 9 year old children using an exposome-wide approach. *PLoS One*. 2015;10(3):e0118701. doi:10.1371/journal.pone.0118701
63. Stratakis N, Conti DV, Borrás E, et al. Association of Fish Consumption and Mercury Exposure During Pregnancy With Metabolic Health and Inflammatory Biomarkers in Children. *JAMA Netw Open*. 2020;3(3):e201007. doi:10.1001/jamanetworkopen.2020.1007
64. Travis SC, Aga DS, Queirolo EI, Olson JR, Daleiro M, Kordas K. Catching flame retardants and pesticides in silicone wristbands: Evidence of exposure to current and legacy pollutants in Uruguayan children. *Sci Total Environ*. 2020;740:140136. doi:10.1016/j.scitotenv.2020.140136
65. Vrijheid M, Fossati S, Maitre L, et al. Early-life environmental exposures and childhood obesity: An exposome-wide approach. *Environ Health Perspect*. 2020;128(6):1-14. doi:10.1289/EHP5975
66. Wan Y, North ML, Navaranjan G, Ellis AK, Siegel JA, Diamond ML. Indoor exposure to phthalates and polycyclic aromatic hydrocarbons (PAHs) to Canadian children: the Kingston allergy birth cohort. *J Expo Sci Environ Epidemiol*. 2021;32:69-81. doi:10.1038/s41370-021-00310-y
67. Warembourg C, Maitre L, Tamayo-Uria I, et al. Early-Life Environmental Exposures and Blood Pressure in Children. *J Am Coll Cardiol*. 2019;74(10):1317-1328. doi:10.1016/j.jacc.2019.06.069
68. Wheeler DC, Rustom S, Carli M, Whitehead TP, Ward MH, Metayer C. Assessment of Grouped Weighted Quantile Sum Regression for Modeling Chemical Mixtures and Cancer Risk. *Int J Environ Res Public Health*. 2021;18(2). doi:10.3390/ijerph18020504
69. Yan Q, Liew Z, Uppal K, et al. Maternal serum metabolome and traffic-related air pollution exposure in pregnancy. *Environ Int*. 2019;130:104872. doi:10.1016/j.envint.2019.05.066

70. Yan Q, Paul KC, Walker DI, et al. High-Resolution Metabolomic Assessment of Pesticide Exposure in Central Valley, California. *Chem Res Toxicol.* 2021;34(5):1337-1347. doi:10.1021/acs.chemrestox.0c00523
71. Yang Q, Zhao Y, Qiu X, Zhang C, Li R, Qiao J. Association of serum levels of typical organic pollutants with polycystic ovary syndrome (PCOS): a case-control study. *Hum Reprod.* 2015;30(8):1964-1973. doi:10.1093/humrep/dev123
72. Yitshak-Sade M, Fabian MP, Lane KJ, et al. Estimating the combined effects of natural and built environmental exposures on birthweight among urban residents in massachusetts. *Int J Environ Res Public Health.* 2020;17(23):1-16. doi:10.3390/ijerph17238805
73. Young AS, Herkert N, Stapleton HM, et al. Chemical contaminant exposures assessed using silicone wristbands among occupants in office buildings in the USA, UK, China, and India. *Environ Int.* 2021;156:106727. doi:10.1016/j.envint.2021.106727
