# Supplementary material
Source: PubMed Central journal article supplement (PMC9645433)
Supplement: ehp11015.smcontents.508.pdf [file ehp11015.smcontents.508.pdf]

**Note to readers with disabilities:** *EHP* strives to ensure that all journal content is accessible to all readers. However, some figures and Supplemental Material published in *EHP* articles may not conform to [508 standards](#) due to the complexity of the information being presented. If you need assistance accessing journal content, please contact [ehp508@niehs.nih.gov](mailto:ehp508@niehs.nih.gov). Our staff will work with you to assess and meet your accessibility needs within 3 working days.

### **Supplemental Material**

#### **Assessing How Social Exposures Are Integrated in Exposome Research: A Scoping Review**

Lola Neufcourt, Raphaële Castagné, Laurence Mabile, Saman Khalatbari-Soltani, Cyrille Delpierre, and Michelle Kelly-Irving

#### **Table of Contents**

**Figure S1.** Selection flowchart.

**Table S1.** Characteristics of the 73 selected studies.

**Table S2.** Use of social variables.

**Table S3.** Nature, frequency and use of the social variables.

**Table S4.** Social hypotheses and mechanisms.

**References**
